# Supplementary material for: Metal–organic-framework-derived porous 3D heterogeneous NiFex/NiFe2O4@NC nanoflowers as highly stable and efficient electrocatalysts for the oxygen-evolution reaction
Source: Royal Society of Chemistry journal article supplement (doi:10.1039/c9ta08077e), 2019-01-01
Supplement: c9ta08077e1.pdf [file c9ta08077e1.pdf]

# Supporting information for

## **Metal-organic-framework-derived porous 3D heterogeneous NiFe<sub>x</sub>/NiFe<sub>2</sub>O<sub>4</sub>@NC nanoflowers as highly stable and efficient electrocatalysts for the oxygen-evolution reaction**

Jia Zhao<sup>1,#</sup>, Xu Zhang<sup>1,#</sup>, Ming Liu<sup>1</sup>, Yi-Zhan Jiang<sup>1</sup>, Min Wang<sup>1</sup>, Zhao-Yang Li<sup>1,\*</sup>, and Zhen Zhou<sup>1,2</sup>

<sup>1</sup>School of Materials Science and Engineering, Nankai University, 38 Tongyan Road, Haihe Educational Park, Tianjin 300350, P.R. China

<sup>2</sup>Tianjin Key Laboratory of Metal and Molecule Based Material Chemistry, Key Laboratory of Advanced Energy Materials Chemistry (Ministry of Education), Institute of New Energy Material Chemistry, Computational Centre for Molecule Science, Nankai University, Tianjin 300071, P.R. China

Email: [zhaoyang@nankai.edu.cn](mailto:zhaoyang@nankai.edu.cn)

#J. Zhao and X. Zhang contributed to this work equally.

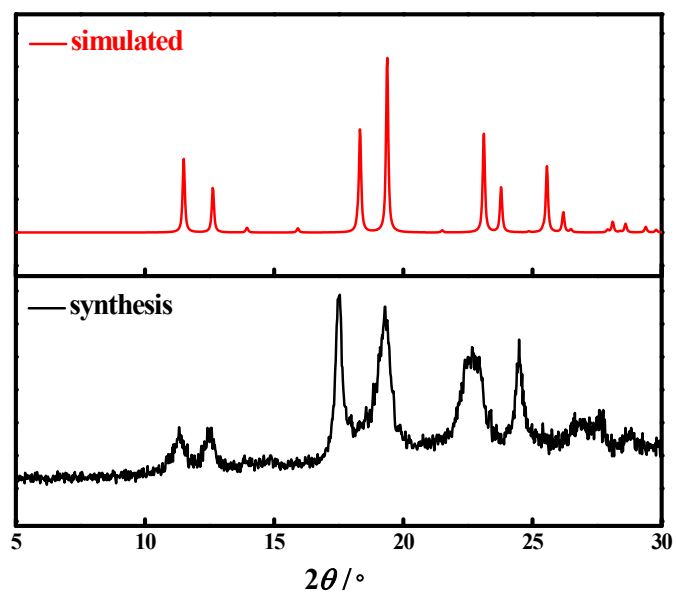

**Fig. S1** The PXR D patterns of NiFe-HF.

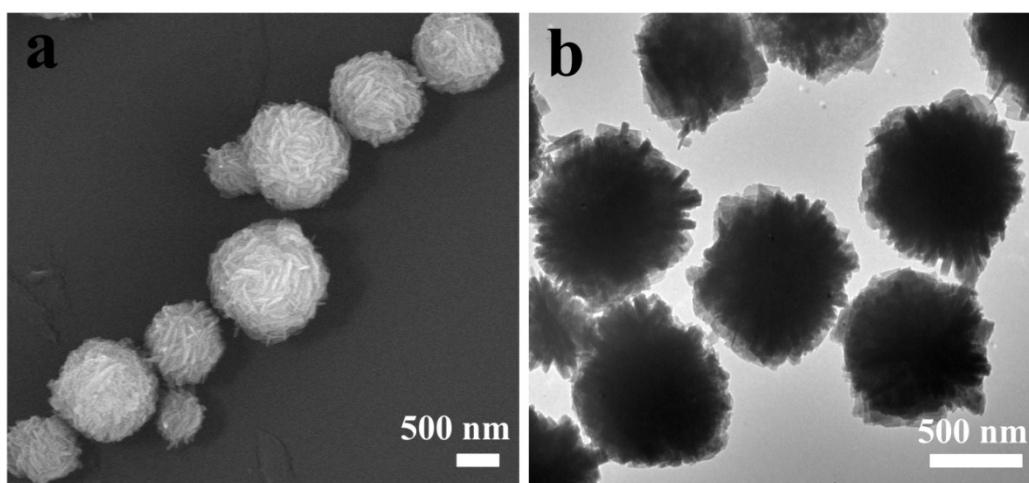

**Fig. S2** The low-magnification SEM image (a) and corresponding TEM image (b) of NiFe-HF.

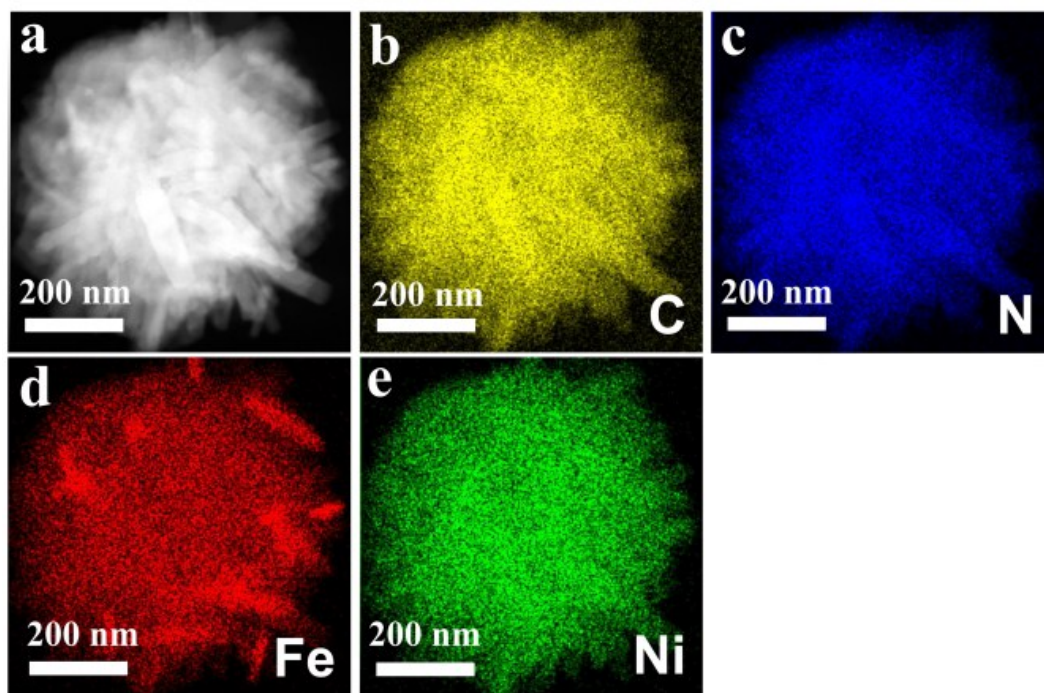

**Fig. S3** The EDS-Mapping of single NiFe-HF nanoflower.

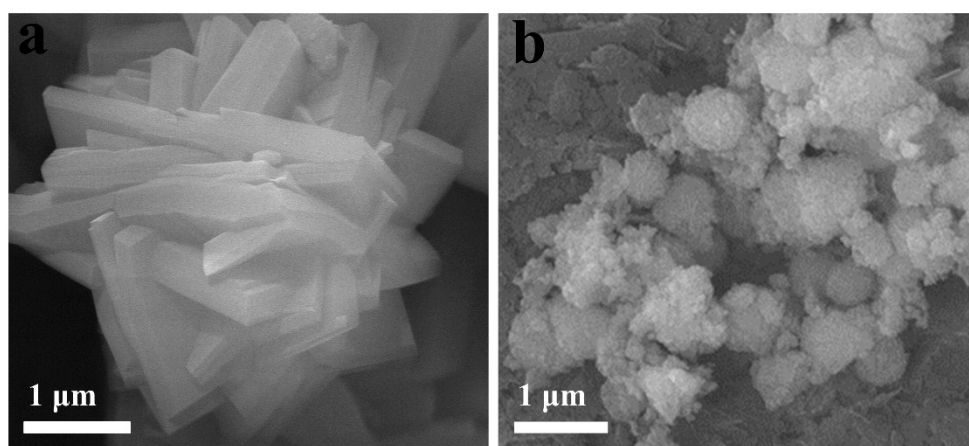

**Fig. S4** (a) The SEM images of initial Hofmann MOFs (b) The SEM images of Hofmann MOFs, when the quality ratio of PVP and ascorbic acid is 10: 1.

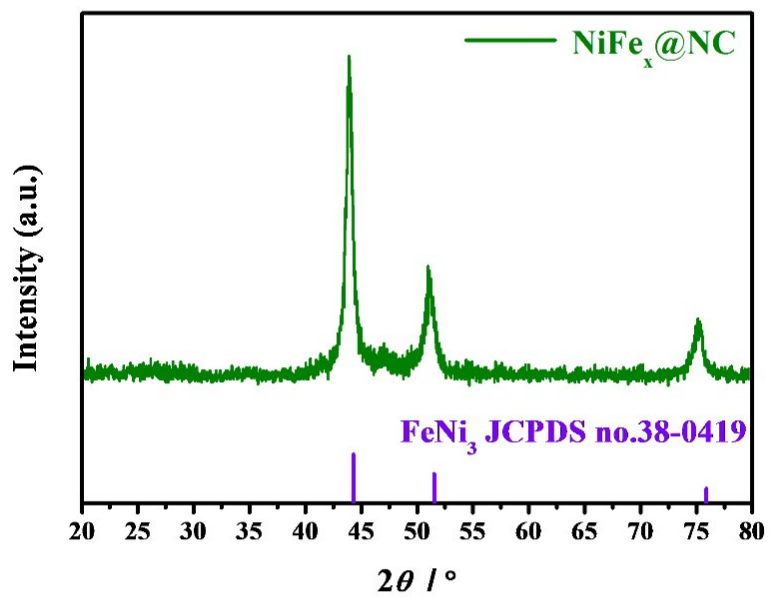

Fig. S5 The PXRD patterns of NiFe<sub>x</sub>@NC.

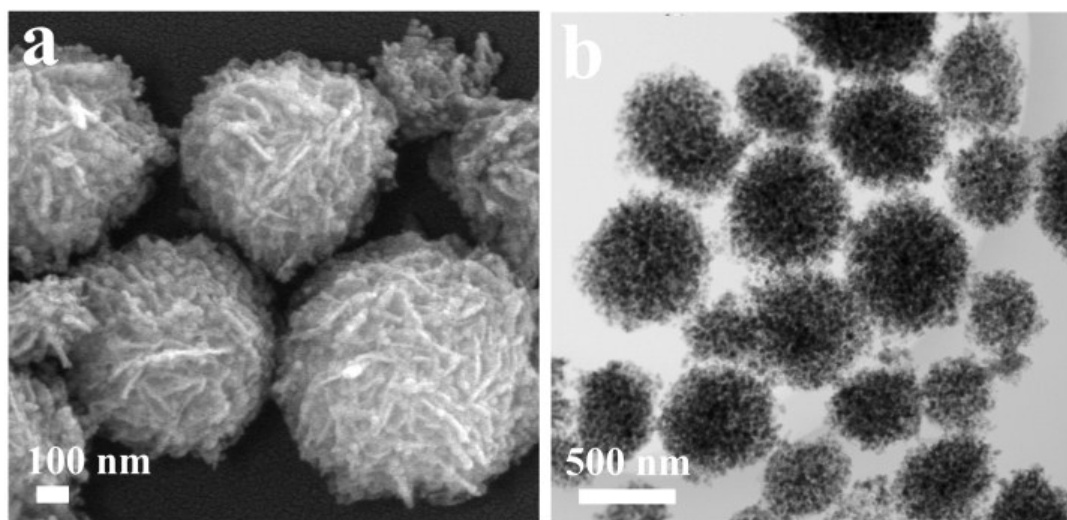

Fig. S6 The low-magnification SEM image (a) and corresponding TEM image (b) of

NiFe<sub>x</sub>@NC nanoflowers.

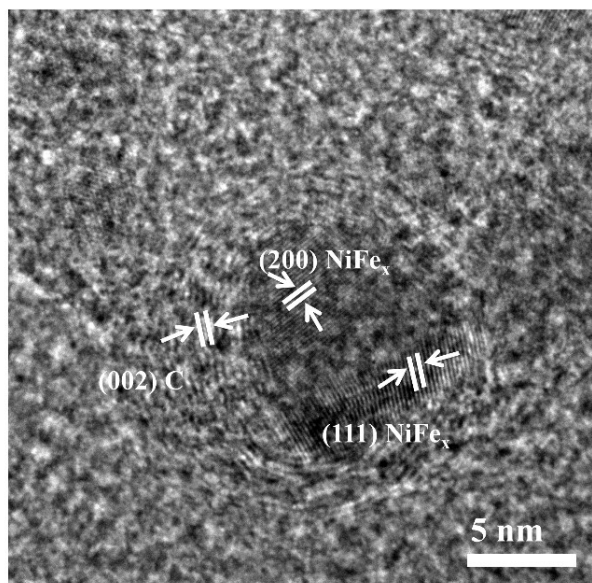

**Fig. S7** HRTEM image of NiFe<sub>x</sub>@NC nanoflower.

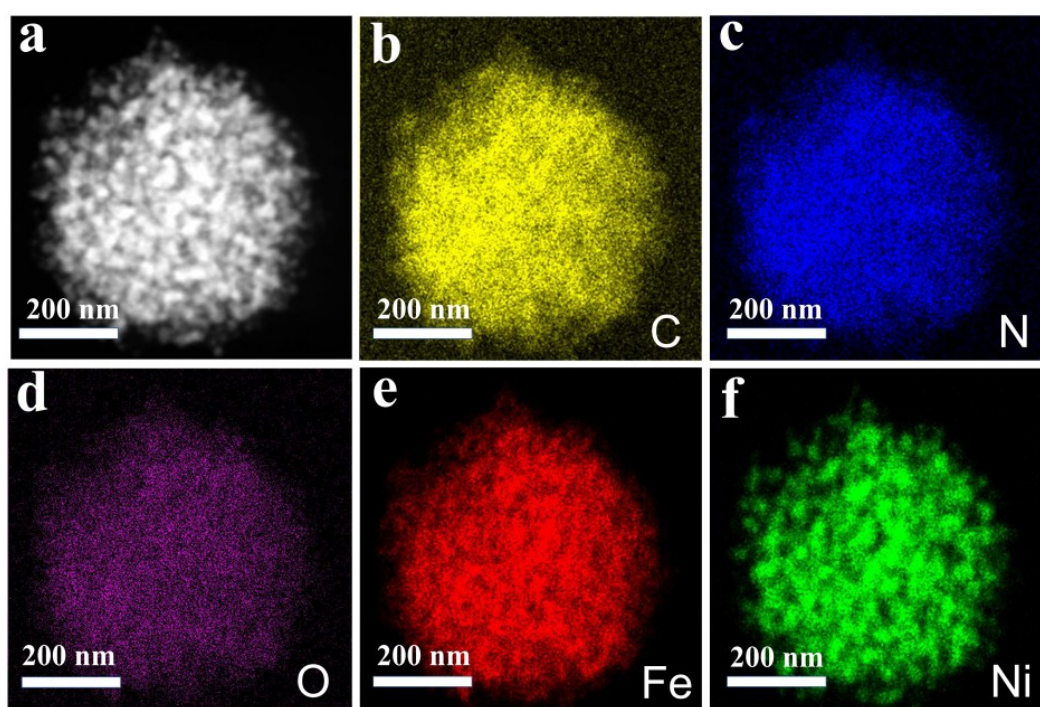

**Fig. S8** The EDS-Mapping of single NiFe<sub>x</sub>@NC nanoflower.

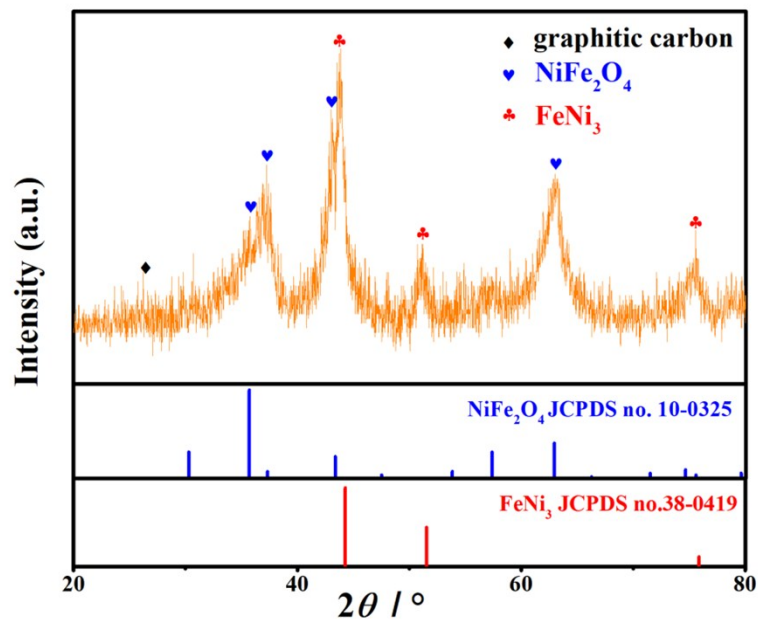

**Fig. S9** The PXR D patterns of NiFe<sub>x</sub>/NiFe<sub>2</sub>O<sub>4</sub>@NC.

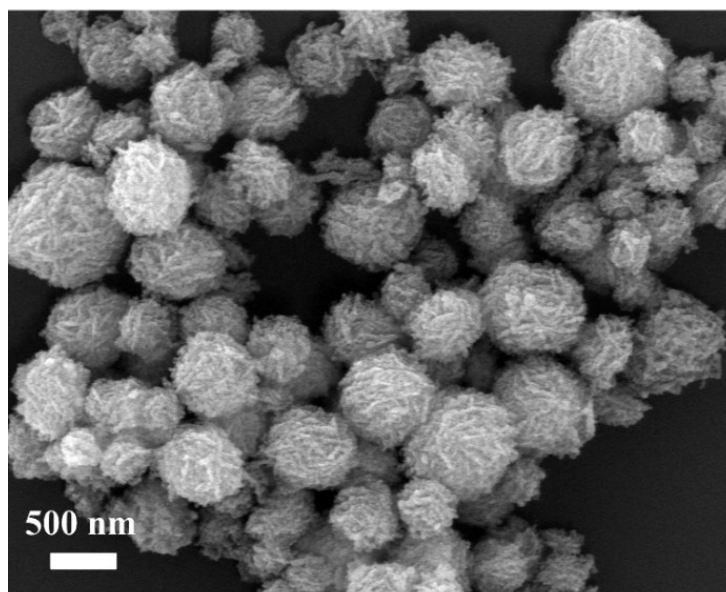

**Fig. S10** The low-magnification SEM image of NiFe<sub>x</sub>/NiFe<sub>2</sub>O<sub>4</sub>@NC.

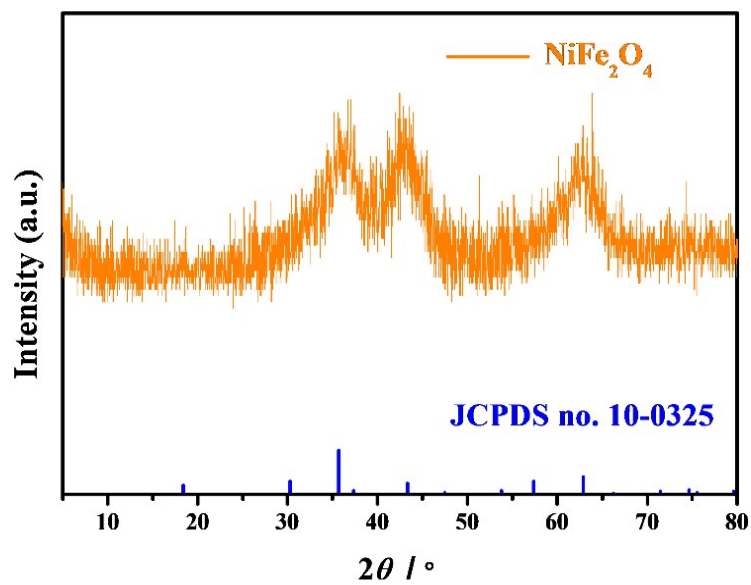

**Fig. S11** The PXRD patterns of  $\text{NiFe}_2\text{O}_4$ .

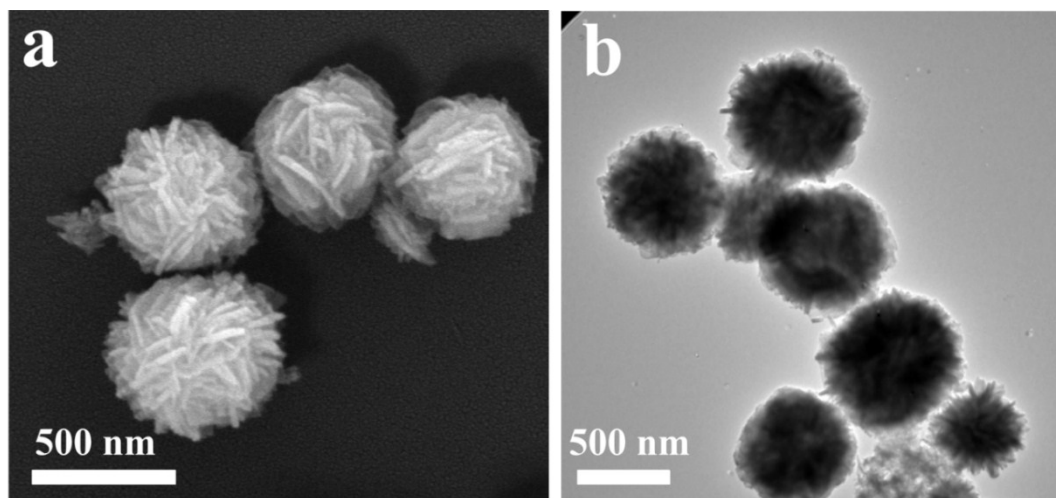

**Fig. S12** The low-magnification SEM image (a) and corresponding TEM image (b) of  $\text{NiFe}_2\text{O}_4$  nanoflowers.

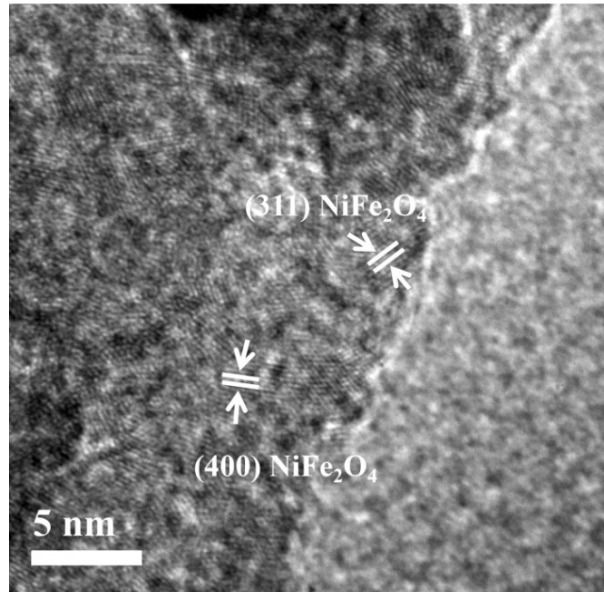

**Fig. S13** HRTEM image of NiFe<sub>2</sub>O<sub>4</sub>.

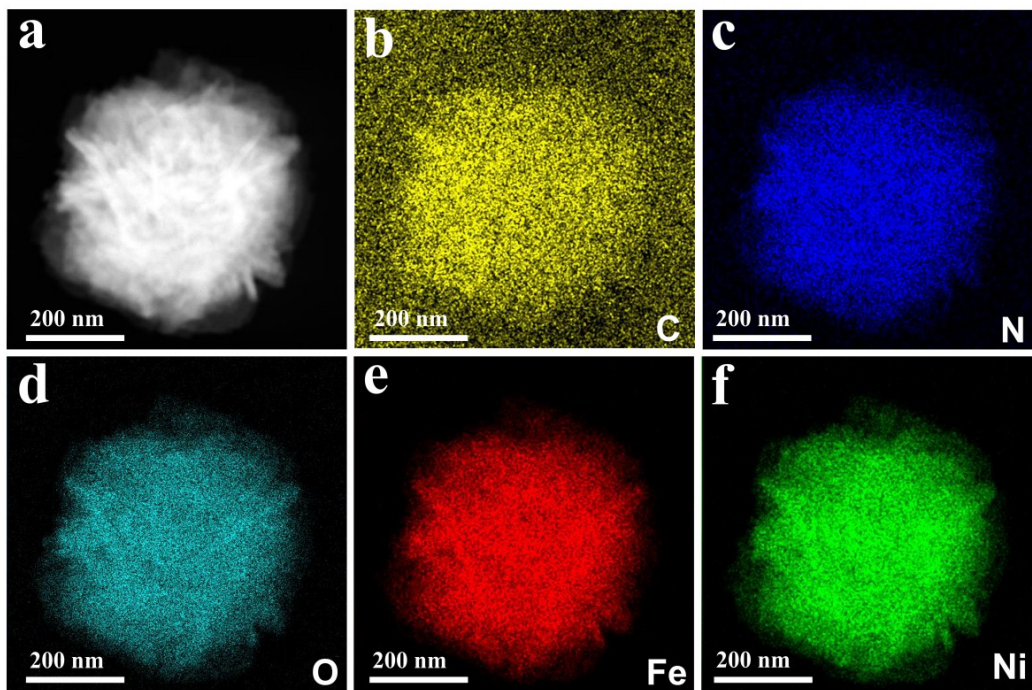

**Fig. S14** The EDS-Mapping of single NiFe<sub>2</sub>O<sub>4</sub> nanoflower.



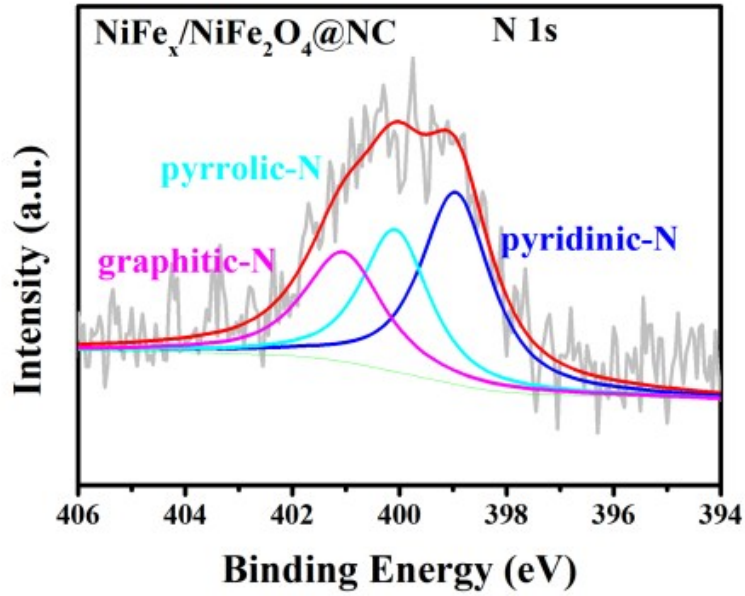

Fig. S15 The XPS N1s spectrum of NiFe<sub>x</sub>/NiFe<sub>2</sub>O<sub>4</sub>@NC.

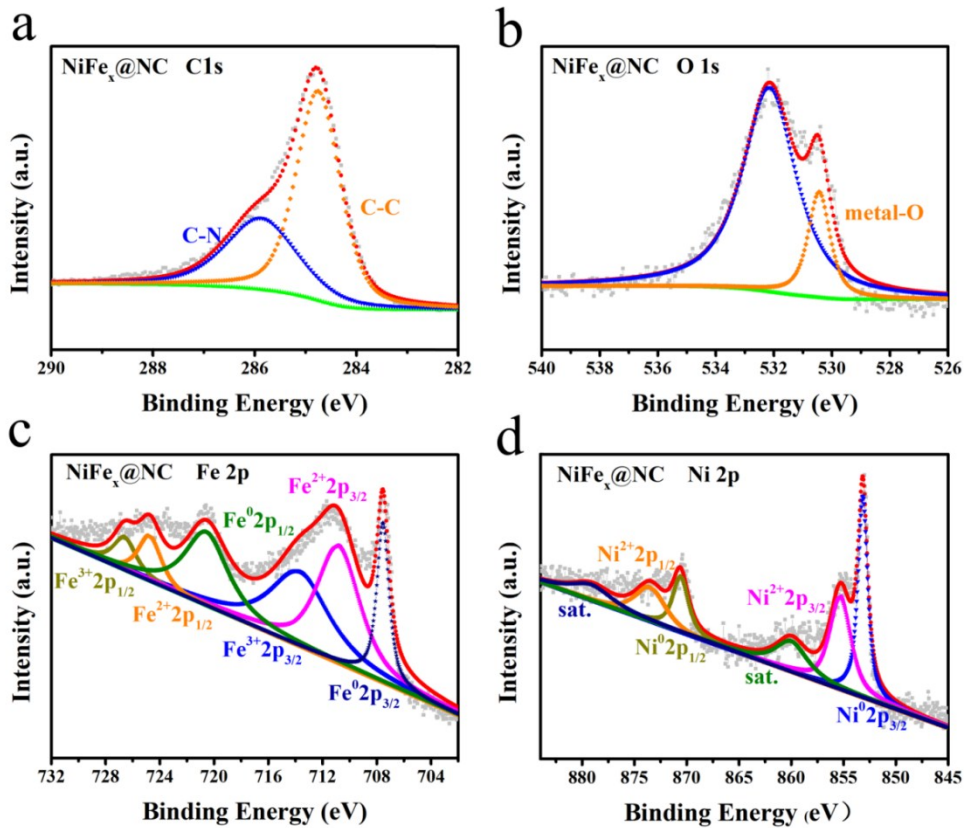

Fig. S16 The XPS C 1s, O 1s, Fe 2p and Ni 2p spectra of NiFe<sub>x</sub>@NC.

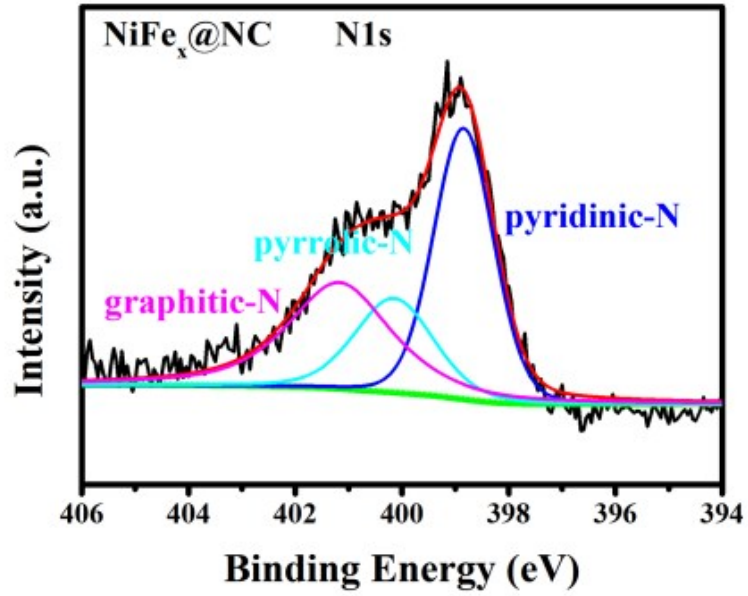

Fig. S17 The XPS N1s spectrum of NiFe<sub>x</sub>@NC.

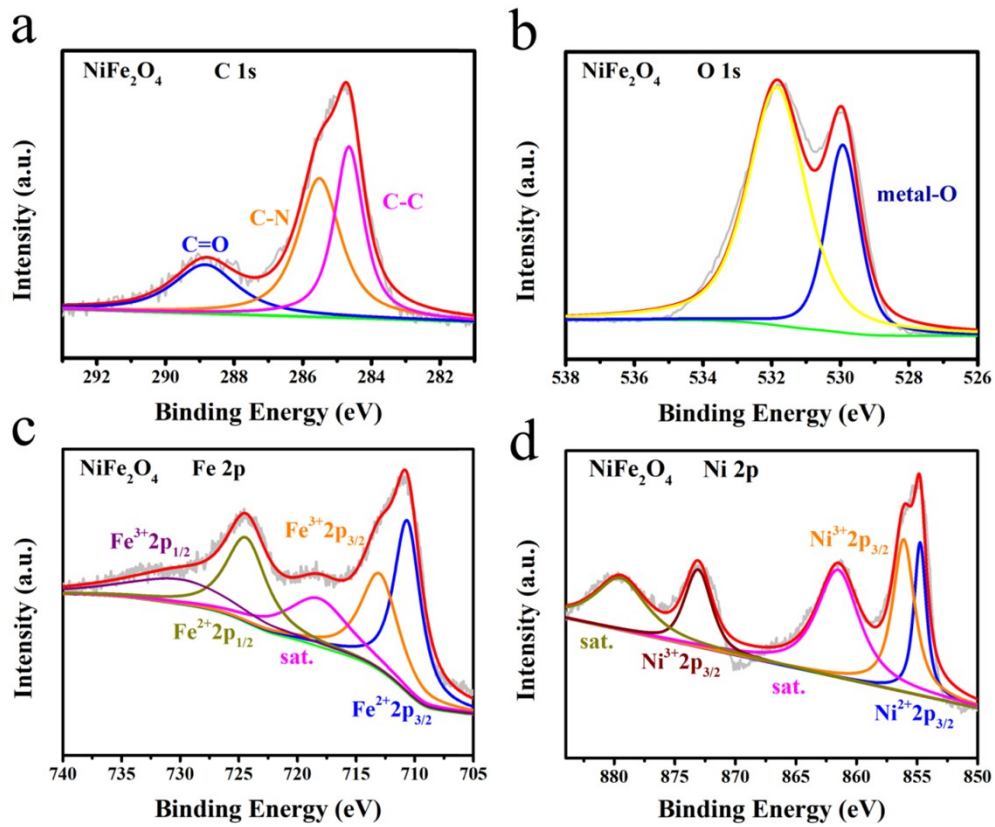

Fig. S18 The XPS C 1s, O 1s, Fe 2p and Ni 2p spectra of NiFe<sub>2</sub>O<sub>4</sub>.

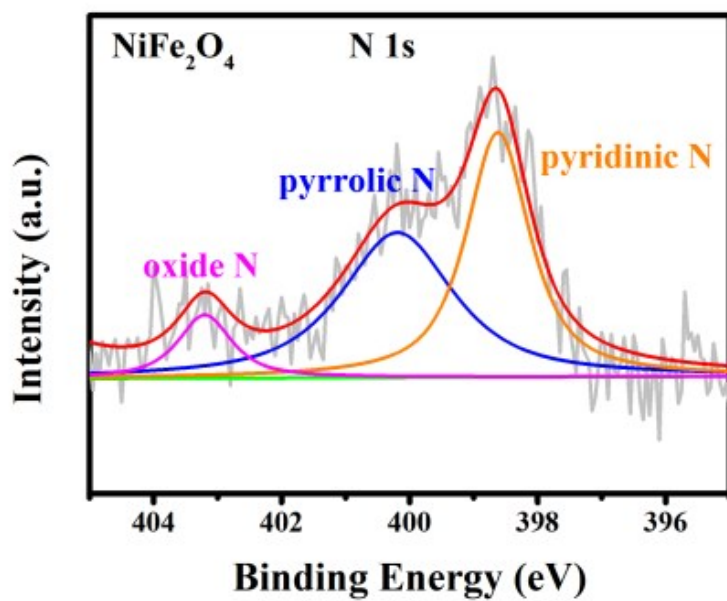

Fig. S19 The XPS N1s spectrum of NiFe<sub>2</sub>O<sub>4</sub>.

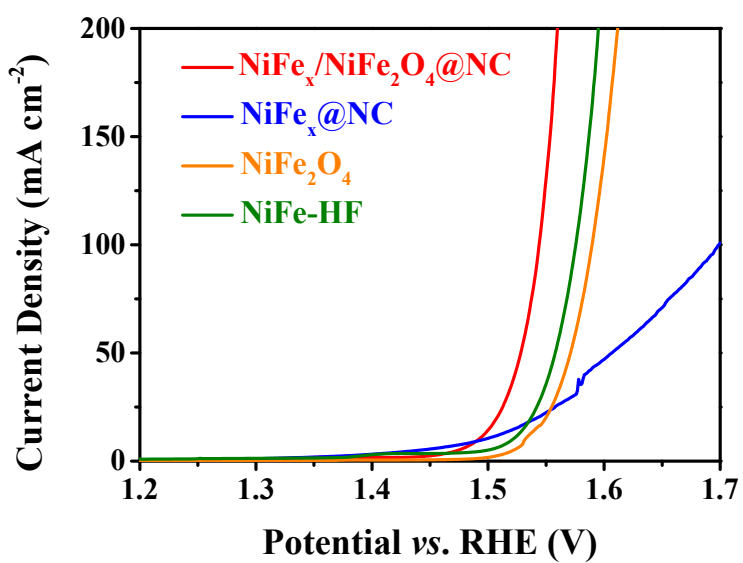

Fig. S20 LSV curves of NiFe<sub>x</sub>/NiFe<sub>2</sub>O<sub>4</sub>@NC, NiFe<sub>x</sub>@NC, NiFe<sub>2</sub>O<sub>4</sub> and NiFe-HF.

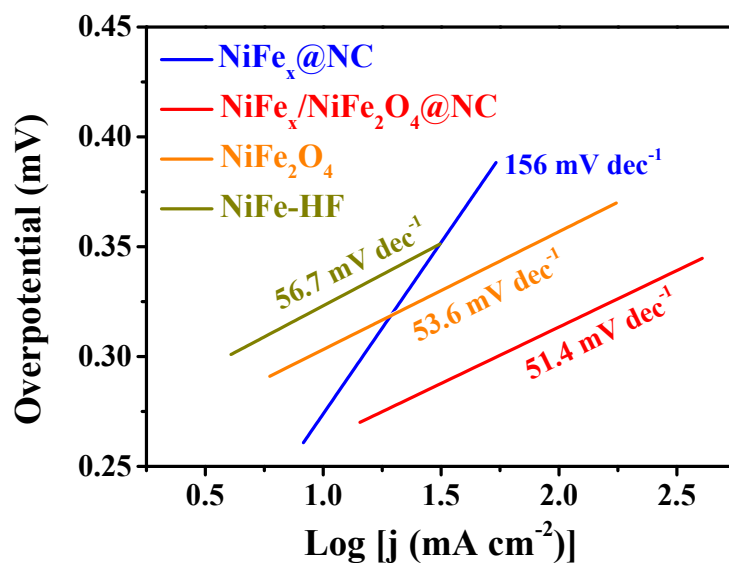

**Fig. S21** Tafel plots of NiFe<sub>x</sub>/NiFe<sub>2</sub>O<sub>4</sub>@NC, NiFe<sub>x</sub>@NC, NiFe<sub>2</sub>O<sub>4</sub> and NiFe-HF.

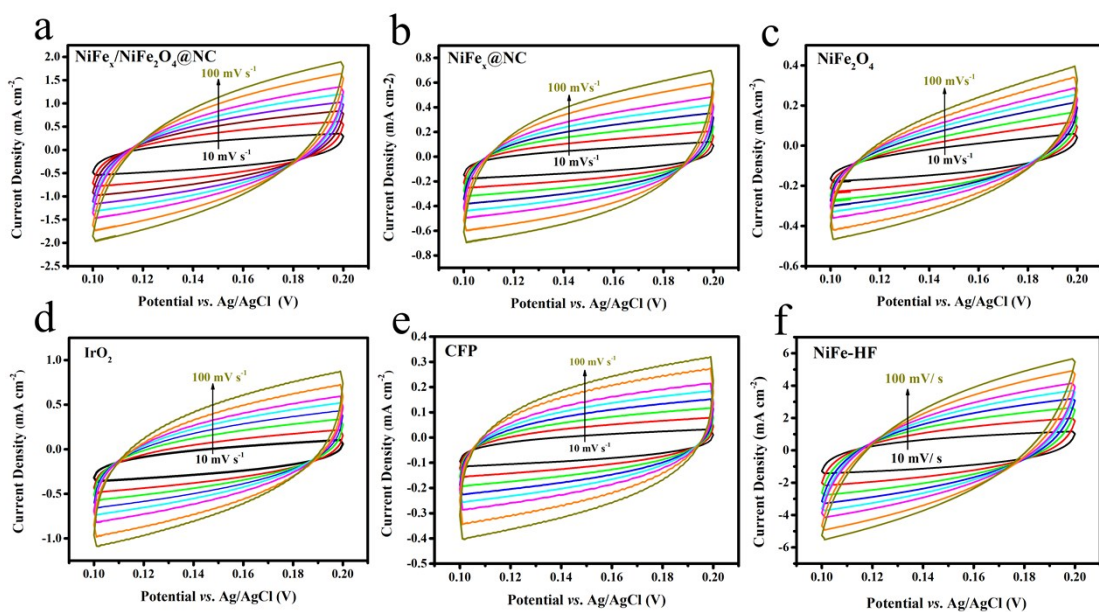

**Fi**

**g. S22** CV curves from 1.11 to 1.21 V (vs RHE) of (a) NiFe<sub>x</sub>/NiFe<sub>2</sub>O<sub>4</sub>@NC, (b)

NiFe<sub>x</sub>@NC, (c) NiFe<sub>2</sub>O<sub>4</sub>, (d) IrO<sub>2</sub>, (e) CFP and (f) NiFe-HF.

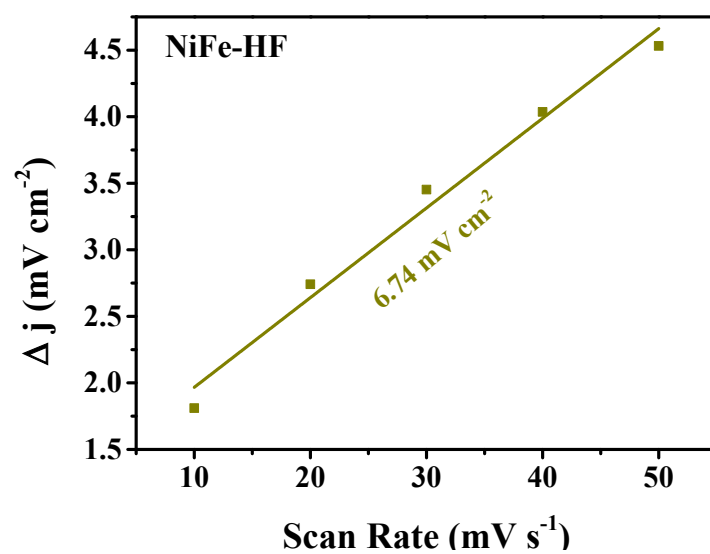

**Fig. S23** Current density (at 1.16 V vs RHE) as function of scan rate for NiFe-HF.

Table S1. The ECSA of as-prepared catalysts.

|      | NiFe <sub>x</sub> @NiFe <sub>2</sub> O <sub>4</sub> @NC | NiFe <sub>x</sub> @NC | NiFe <sub>2</sub> O <sub>4</sub> | NiFe-HF |
|------|---------------------------------------------------------|-----------------------|----------------------------------|---------|
| ECSA | 4.81                                                    | 0.93                  | 1.97                             | 1.3     |

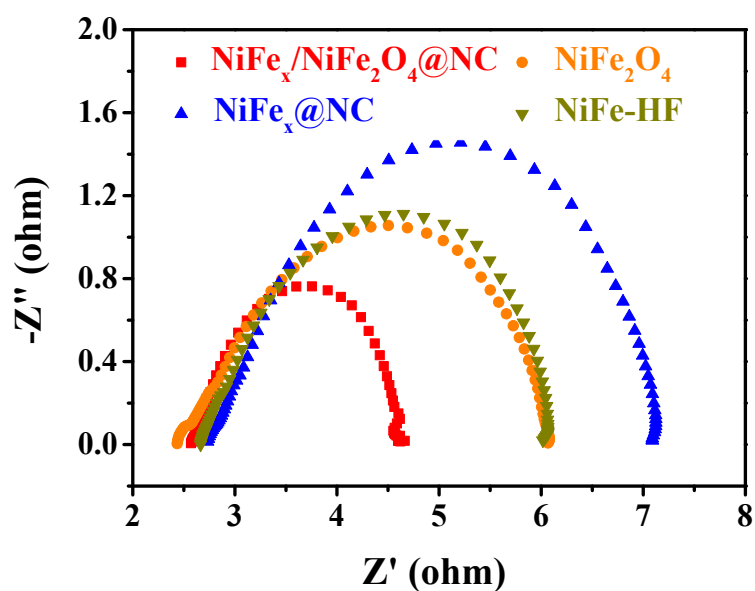

**Fig. S24** Nyquist plots of NiFe<sub>x</sub>/NiFe<sub>2</sub>O<sub>4</sub>@NC, NiFe<sub>x</sub>@NC, NiFe<sub>2</sub>O<sub>4</sub> and NiFe-HF.

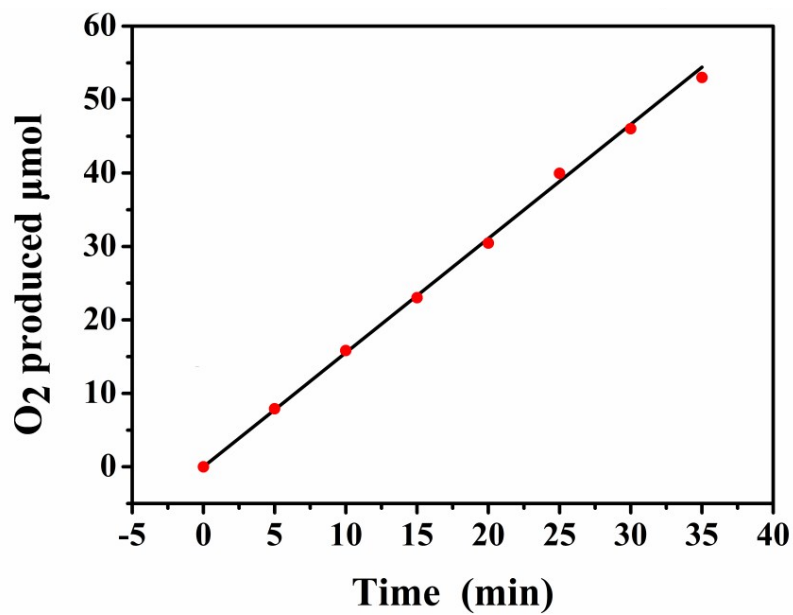

Fig. S25 Faradaic efficiency plot of NiFe<sub>x</sub>@NiFe<sub>2</sub>O<sub>4</sub>@NC.

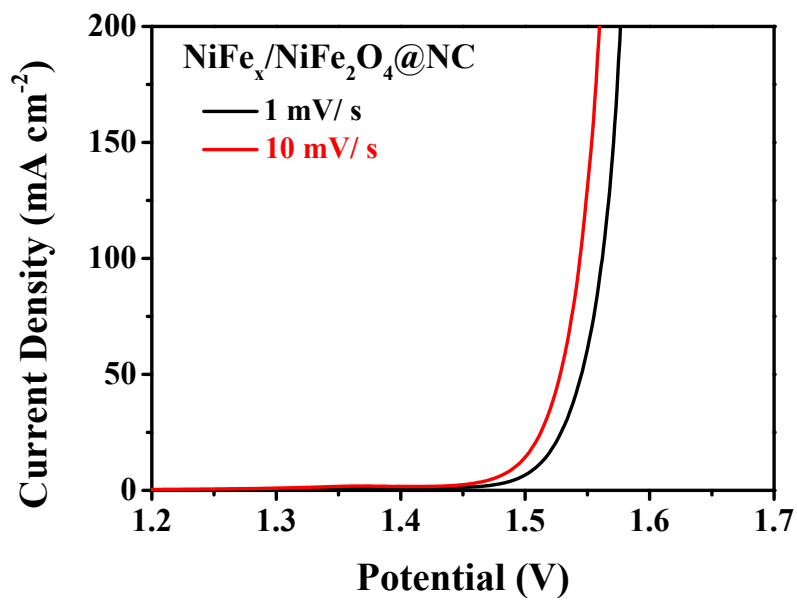

Fig. S26 LSV curves of NiFe<sub>x</sub>/NiFe<sub>2</sub>O<sub>4</sub>@NC at different scan rates.

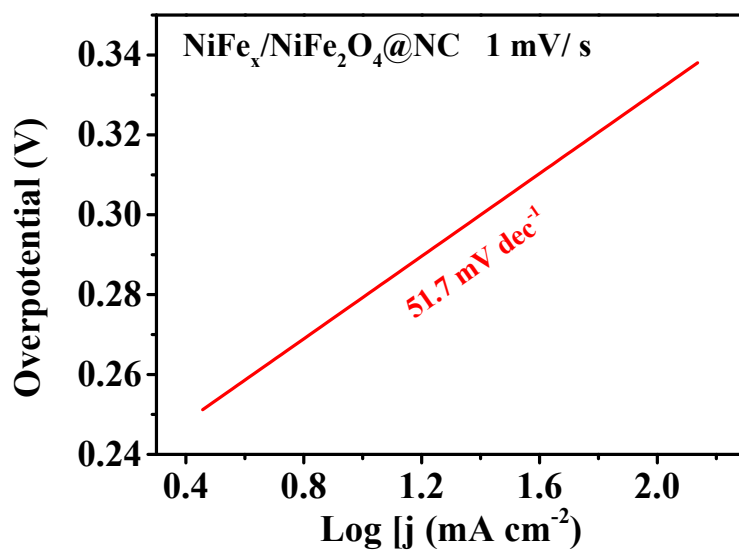

Fig. S27 Tafel plot of NiFe<sub>x</sub>/NiFe<sub>2</sub>O<sub>4</sub>@NC at a scan rate of 1 mV/ s.

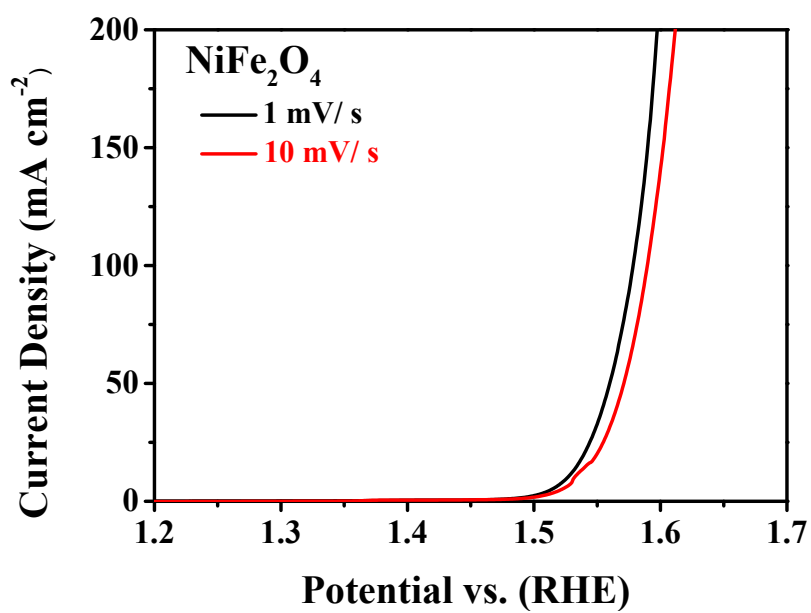

Fig. S28 LSV curves of NiFe<sub>2</sub>O<sub>4</sub> at different scan rates.

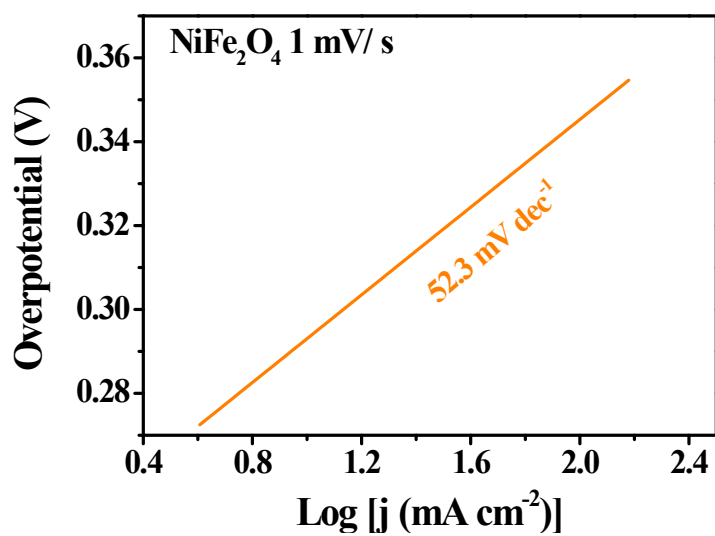

Fig. S29 Tafel plot of NiFe<sub>2</sub>O<sub>4</sub> at a scan rate of 1 mV/ s.

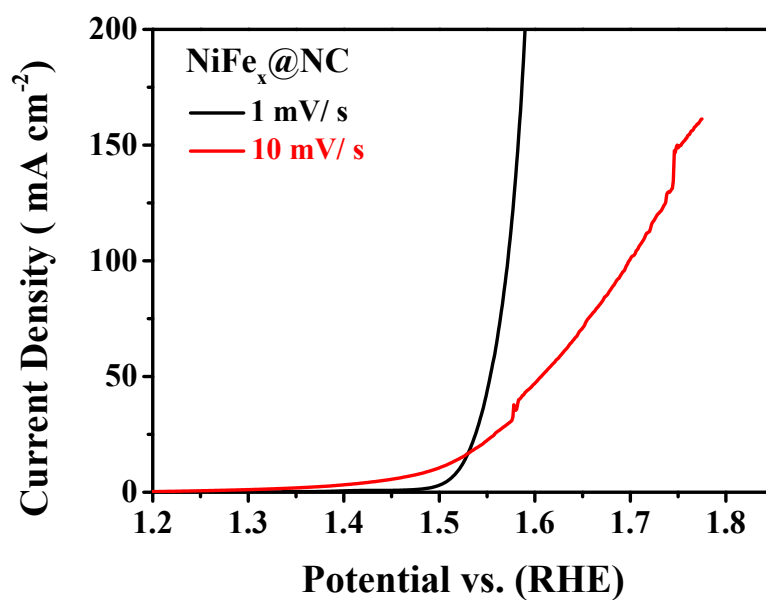

Fig. S30 LSV curves of NiFe<sub>x</sub>@NC at different scan rates.



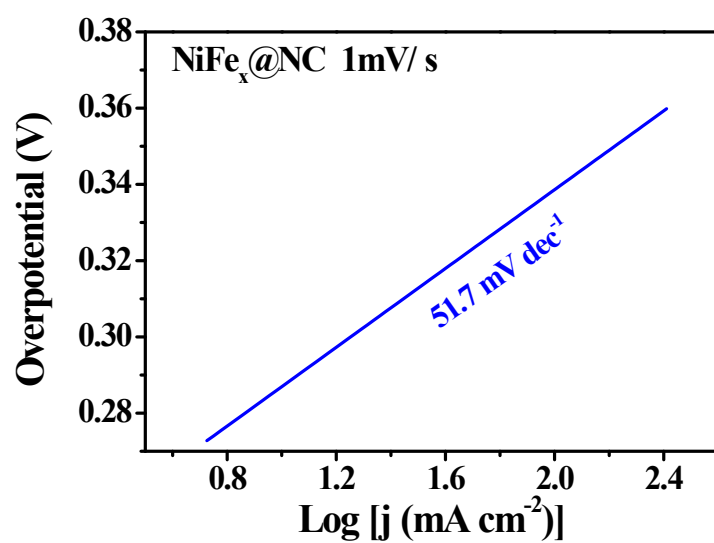

Fig. S31 Tafel plot of NiFe<sub>x</sub>@NC at a scan rate of 1 mV/s.

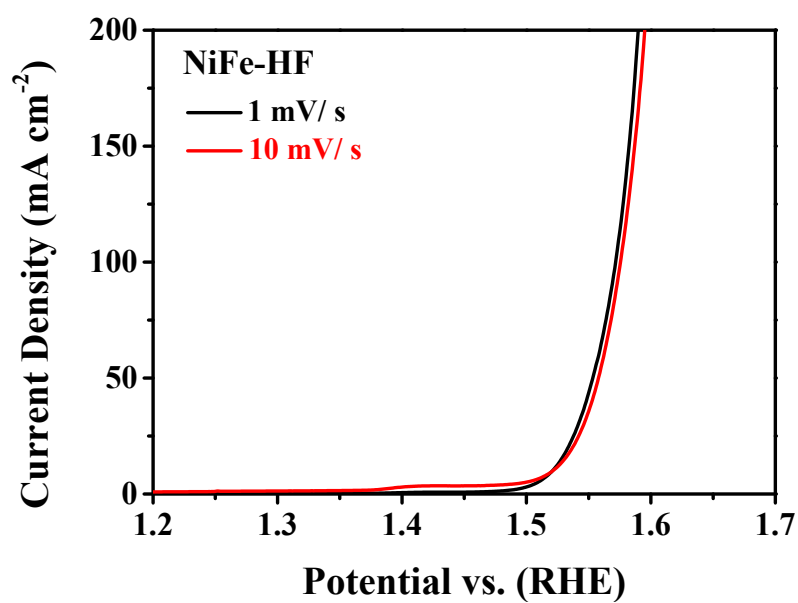

Fig. S32 LSV curves of NiFe-HF at different scan rates.

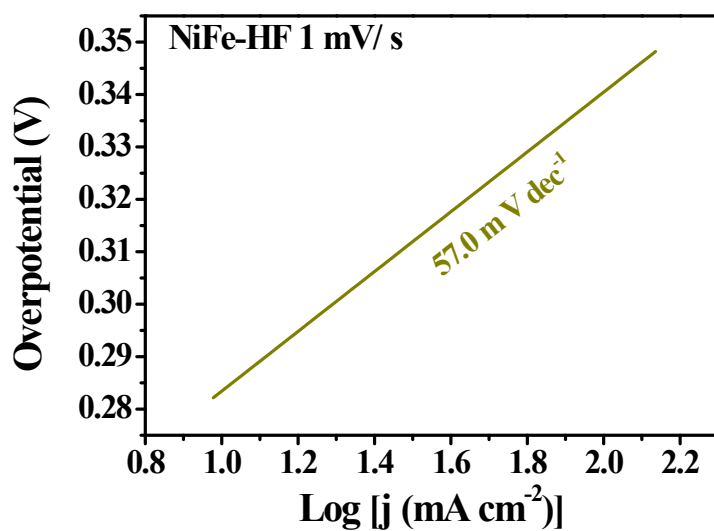

Fig. S33 Tafel plot of NiFe-HF at a scan rate of 1 mV/ s.

Table S2. Comparison of overpotentials of the as-prepared catalysts at different scan rates.

| Scan rate | NiFe <sub>x</sub> /NiFe <sub>2</sub> O <sub>4</sub> @NC (mV) | NiFe <sub>2</sub> O <sub>4</sub> (mV) | NiFe <sub>x</sub> @NC (mV) | NiFe-HF (mV) |
|-----------|--------------------------------------------------------------|---------------------------------------|----------------------------|--------------|
| 1 mV/ s   | 278                                                          | 297                                   | 281                        | 281          |
| 10 mV/ s  | 262                                                          | 302                                   | 266                        | 282          |

Table S3. Comparison of Tafel slopes of the as-prepared catalysts at different scan rates.

| Scan rate | NiFe <sub>x</sub> /NiFe <sub>2</sub> O <sub>4</sub> @NC<br>(mV dec <sup>-1</sup> ) | NiFe <sub>2</sub> O <sub>4</sub><br>(mV dec <sup>-1</sup> ) | NiFe <sub>x</sub> @NC<br>(mV dec <sup>-1</sup> ) | NiFe-HF<br>(mV dec <sup>-1</sup> ) |
|-----------|------------------------------------------------------------------------------------|-------------------------------------------------------------|--------------------------------------------------|------------------------------------|
| 1 mV/ s   | 51.7                                                                               | 52.3                                                        | 51.7                                             | 57.0                               |
| 10 mV/ s  | 51.4                                                                               | 53.6                                                        | 156                                              | 56.7                               |

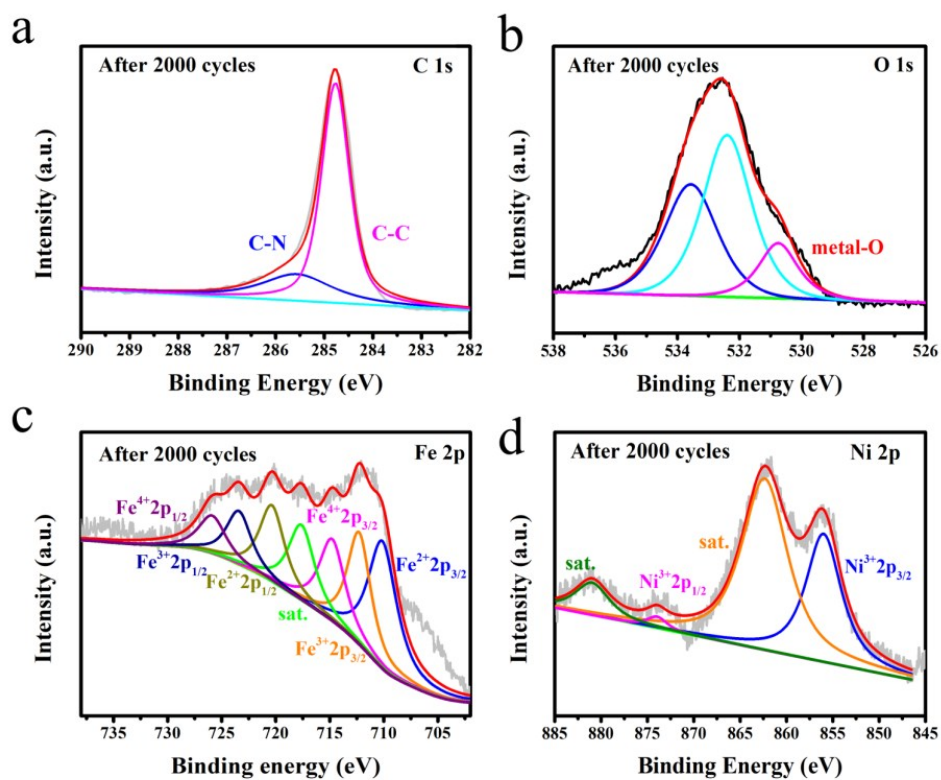

**Fig. S34** XPS C 1s (a), O 1s (b), Fe 2p (c), Ni 2p (d) spectra of NiFe<sub>x</sub>/NiFe<sub>2</sub>O<sub>4</sub>@NC after 2000 cycles.

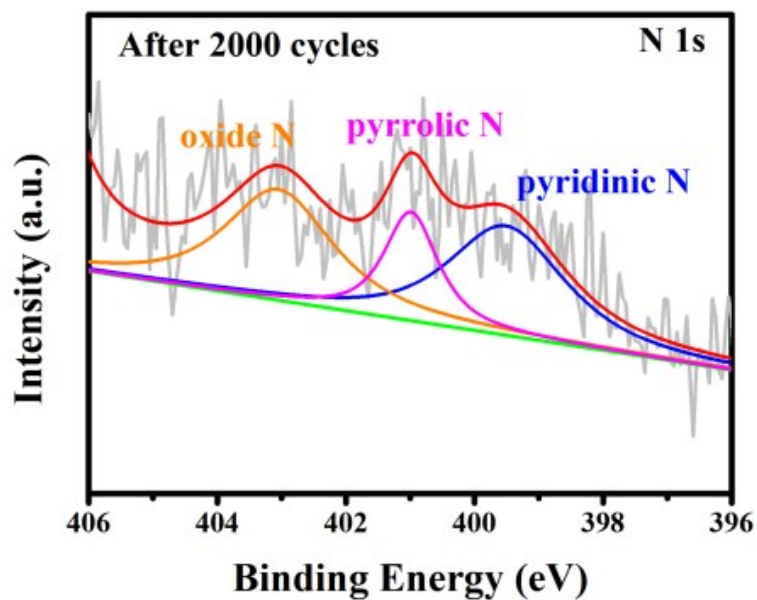

**Fig. S35** XPS N 1s spectrum of NiFe<sub>x</sub>/NiFe<sub>2</sub>O<sub>4</sub>@NC after 2000 cycles.

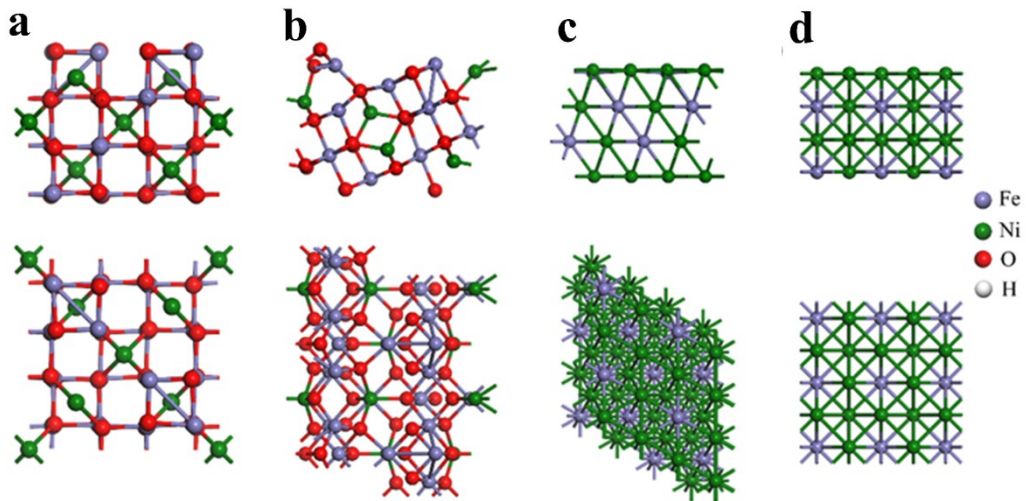

**Fig. S36** Side (up) and top (down) view of the geometry of (a)  $\text{NiFe}_2\text{O}_4$  (400), (b) (311), (c)  $\text{FeNi}_3$  (111) and (d) (200) surface.

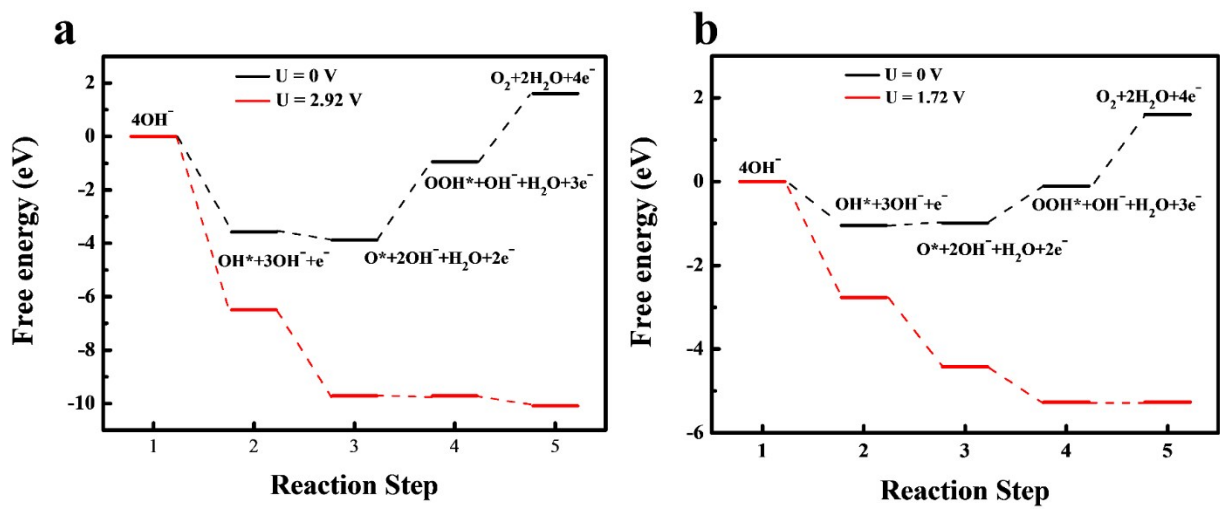

**Fig. S37** Free energy diagram for OER on (a)  $\text{NiFe}_2\text{O}_4$  (400) and (b) (311) surfaces at different electrode potentials in alkaline media

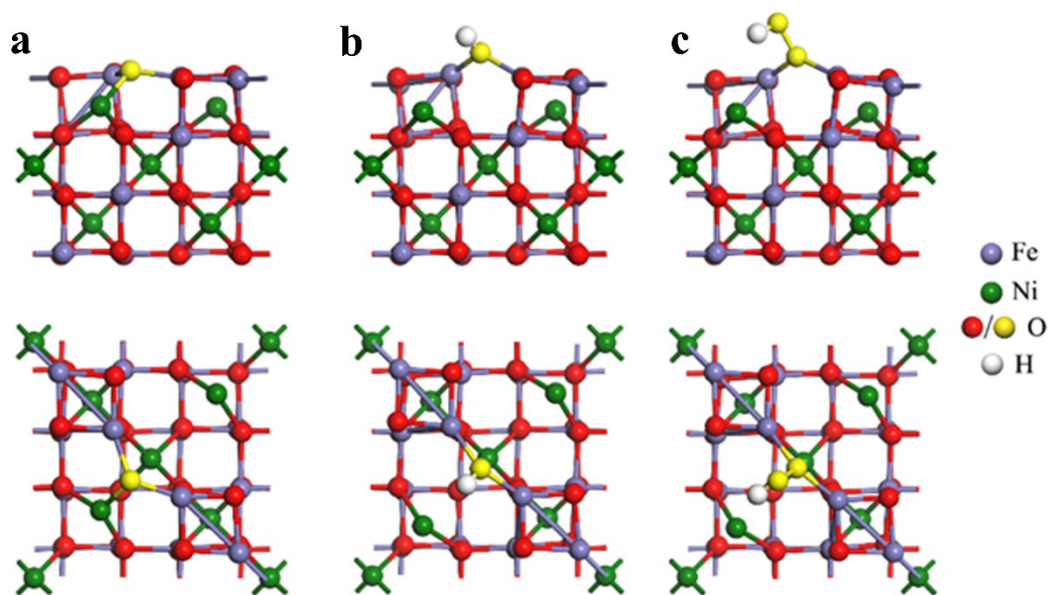

**Fig. S38** Side (up) and top (down) view of NiFe<sub>2</sub>O<sub>4</sub> (400) after the adsorption of (a) O\*, (b) OH\* and (c) OOH\*.

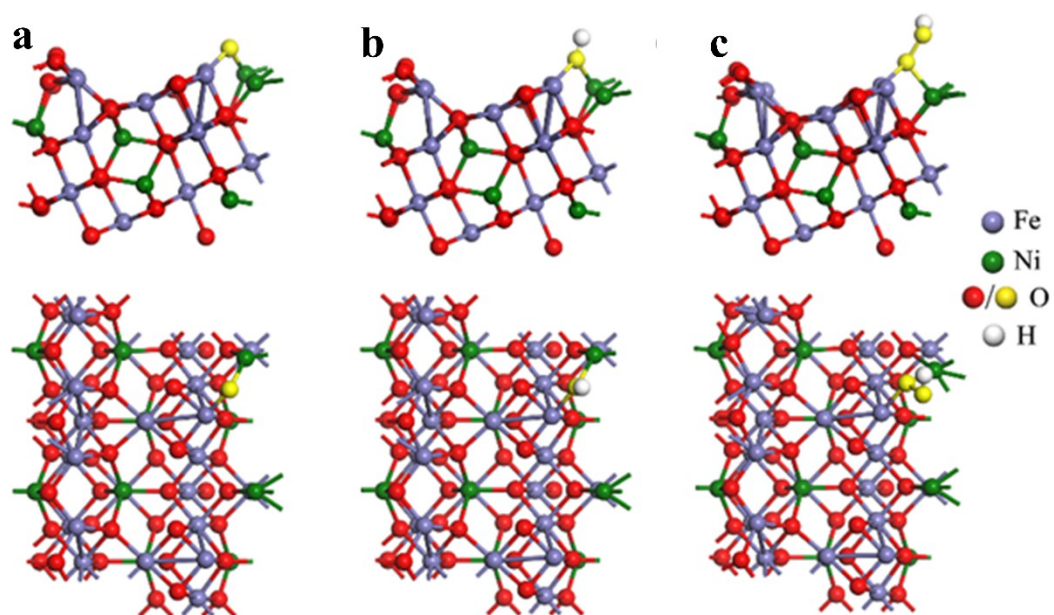

**Fig. S39** Side (up) and top (down) view of NiFe<sub>2</sub>O<sub>4</sub> (311) after the adsorption of (a) O\*, (b) OH\* and (c) OOH\*.

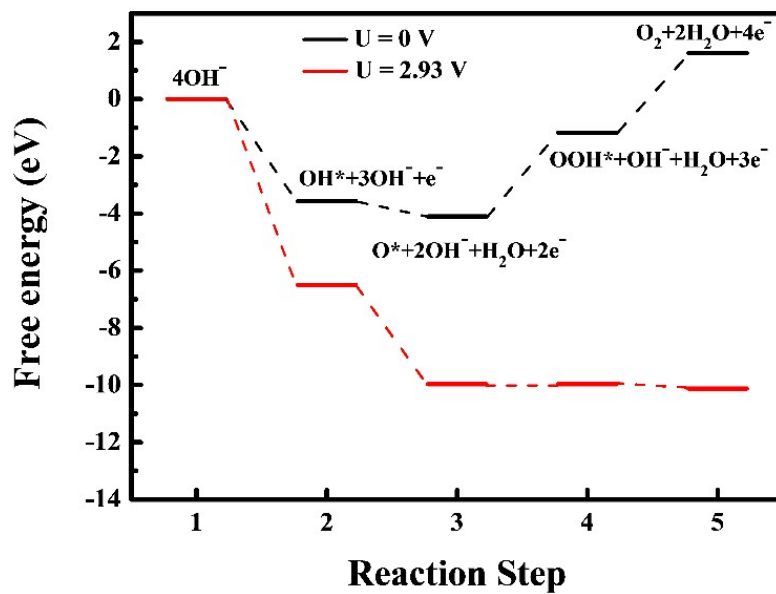

**Fig. S40** Free energy diagram for OER on FeNi<sub>3</sub> (200) surface at different electrode potentials in alkaline media.

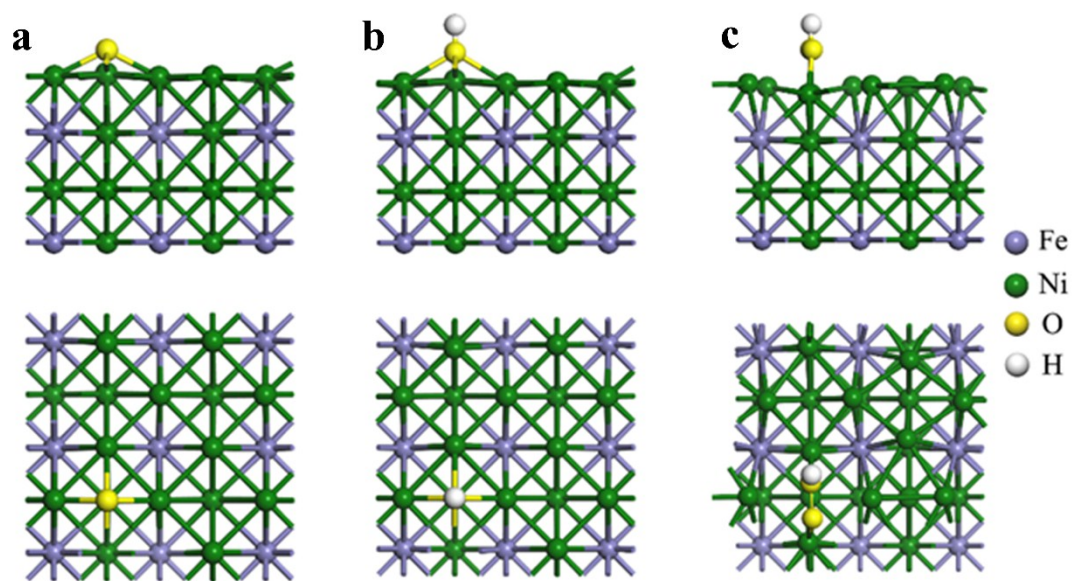

**Fig. S41** Side (up) and top (down) view of FeNi<sub>3</sub> (200) after the adsorption of (a) O\*, (b) OH\* and (c) OOH\*.

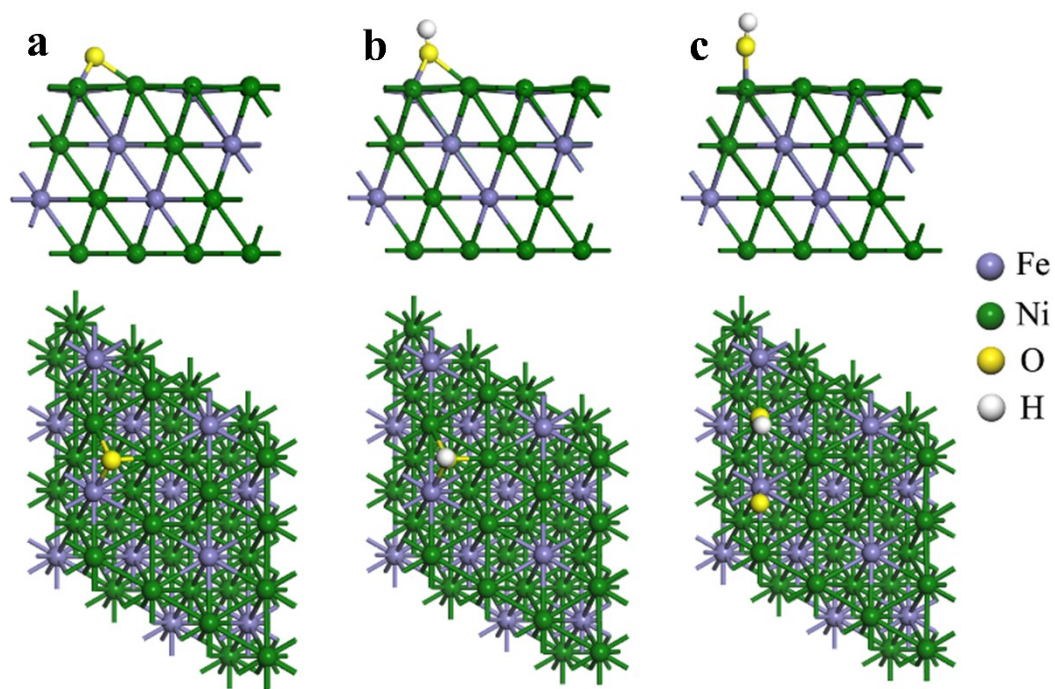

**Fig. S42** Side (up) and top (down) view of FeNi<sub>3</sub> (111) after the adsorption of (a) O\*, (b) OH\* and (c) OOH\*.

**Table S4** Comparison of OER performance of NiFe<sub>x</sub>/NiFe<sub>2</sub>O<sub>4</sub>@NC with other reported non-precious metal electrocatalysts tested under similar conditions.

| Material                                                             | Electrolyte | Current Density (mA cm <sup>-2</sup> ) | Overpotential (mV) | Stability (h) | C <sub>dl</sub> (mF cm <sup>-2</sup> ) | Tafel slope (mV dec <sup>-1</sup> ) |
|----------------------------------------------------------------------|-------------|----------------------------------------|--------------------|---------------|----------------------------------------|-------------------------------------|
| NiFe <sub>x</sub> /NiFe <sub>2</sub> O <sub>4</sub> @NC<br>this work | 1 M KOH     | 10                                     | 262                | 150           | 24.93                                  | 51.4                                |
| NiO/NiFe LDH [1]                                                     | 1 M KOH     | 10                                     | 215                | 10            | —                                      | 32                                  |
| Fe-Ni@NC-CNTs [2]                                                    | 1 M KOH     | 10                                     | 274                | 11            | 12.34                                  | 45.47                               |
| NiFe<br>LDH@NiCoP/NF [3]                                             | 1 M KOH     | 10                                     | 220                | 100           | 18.07                                  | 48.6                                |
| Two cycle<br>NiFeO <sub>x</sub> /CFP [4]                             | 1 M KOH     | 10                                     | 200                | 100           | —                                      | 31.5                                |
| NiFe NCs [5]                                                         | 1 M KOH     | 10                                     | 271                | 18            | 16.3                                   | 48                                  |
| Ni <sub>2</sub> Fe <sub>1</sub> nanofoams<br>[6]                     | 1 M KOH     | 10                                     | 270                | 12            | 0.34                                   | 70                                  |
| P-Ni <sub>0.5</sub> Fe@C [7]                                         | 1M KOH      | 10                                     | 256                | 15            | 7.9                                    | 65                                  |
| P-NiFe <sub>2</sub> O <sub>4</sub> nanosheet<br>[8]                  | 1 M KOH     | 10                                     | 231                | 50            | 26.5                                   | 49                                  |
| Fe-Ni-O <sub>x</sub> [9]                                             | 0.1 M KOH   | 10                                     | 584                | 1.7           | 3.82                                   | 72                                  |
| NiFeO <sub>x</sub> (Fe)/NF-2<br>[10]                                 | 0.1 M KOH   | 10                                     | 260                | 12            | 2.47                                   | 41                                  |
| hcp-NiFe@NC [11]                                                     | 1 M KOH     | 10                                     | 226                | 35            | —                                      | 41                                  |
| NiFe/NiFeO <sub>x</sub> (0.1)<br>[12]                                | 0.1 M KOH   | 10                                     | 340                | —             | —                                      | 34                                  |
| FeB <sub>2</sub> [13]                                                | 1 M KOH     | 10                                     | 296                | 48            | 33.68                                  | 52.4                                |
| Ni-Fe-O-P [14]                                                       | 1 M KOH     | 10                                     | 227                | 10            | —                                      | 50                                  |
| NiFe-OH NS/NF [15]                                                   | 1 M KOH     | 50                                     | 244                | 30            | 5.145                                  | 46.7                                |
| LaNiFe hydroxide<br>[16]                                             | 1 M KOH     | 10                                     | 189                | 100           | —                                      | 36                                  |
| NiFe/MoS <sub>2</sub> sheet [17]                                     | 1 M KOH     | 10                                     | 260                | 24            | 4.61                                   | 48                                  |
| Mo-doped Ni-Fe<br>oxide [18]                                         | 1 M KOH     | 10                                     | 231                | 16            | —                                      | 39                                  |
| FeNi <sub>3</sub> @c-2% [19]                                         | 1 M KOH     | 10                                     | 275                | 10            | 6.8                                    | 62                                  |
| FeNi <sub>3</sub> /NiFeO <sub>x</sub> [20]                           | 1 M KOH     | 10                                     | 246                | 1.67          | 0.0551                                 | —                                   |

## References

1. Z. W. Gao, J. Y. Liu, X. M. Chen, X. L. Zheng, J. Mao, H. Liu, T. Ma, L. Li, W. C. Wang and X. W. Du, *Adv. Mater.*, 2019, **31**, 1804769–1804777.
2. X. Zhao, P. Pachfule, S. Li, J. R. J. Simke, J. Schmidt and A. Thomas, *Angew. Chem., Int. Ed.*, 2018, **57**, 8921–8926.
3. H. Zhang, X. Li, A. Hähnel, V. Naumann, C. Lin, S. Azimi, S. L. Schweizer, A. W.



- Maijenburg and R. B. Wehrspohn, *Adv. Funct. Mater.*, 2018, **28**, 1706847–1706857.
4. H. Wang, H. W. Lee, Y. Deng, Z. Lu, P. C. Hsu, Y. Liu, D. Lin and Y. Cui, *Nat. Commun.*, 2015, **6**, 7261–7269.
  5. A. Kumar and S. Bhattacharyya, *ACS Appl. Mater. Interfaces*, 2017, **9**, 41906–41915.
  6. S. Fu, J. Song, C. Zhu, G.-L. Xu, K. Amine, C. Sun, X. Li, M. H. Engelhard, D. Du and Y. Lin, *Nano Energy*, 2018, **44**, 319–326.
  7. A. Fan, C. Qin, X. Zhang, X. Dai, Z. Dong, C. Luan, L. Yu, J. Ge and F. Gao, *ACS Sustain. Chem. Eng.*, 2018, **7**, 2285–2295.
  8. Q. Chen, R. Wang, F. Lu, X. Kuang, Y. Tong and X. Lu, *ACS Omega*, 2019, **4**, 3493–3499.
  9. J. Jiang, C. Zhang and L. Ai, *Electrochim. Acta*, 2016, **208**, 17–24.
  10. X. Shang, Z. Z. Liu, J. Q. Zhang, B. Dong, Y. L. Zhou, J. F. Qin, L. Wang, Y. M. Chai and C. G. Liu, *ACS Appl. Mater. Interfaces*, 2018, **10**, 42217–42224.
  11. C. Wang, H. Yang, Y. Zhang and Q. Wang, *Angew. Chem., Int. Ed.*, 2019, **58**, 6099–6103.
  12. K. Zhu, M. Li, X. Li, X. Zhu, J. Wang and W. Yang, *Chem. Commun.*, 2016, **52**, 11803–11806.
  13. H. Li, P. Wen, Q. Li, C. Dun, J. Xing, C. Lu, S. Adhikari, L. Jiang, D. L. Carroll and S. M. Geyer, *Adv. Energy Mater.*, 2017, **7**, 1700513–1700525.
  14. C. Xuan, J. Wang, W. Xia, J. Zhu, Z. Peng, K. Xia, W. Xiao, Huolin L. Xin and D. Wang, *J. Mater. Chem. A*, 2018, **6**, 7062–7069.
  15. W. Zhu, T. Zhang, Y. Zhang, Z. Yue, Y. Li, R. Wang, Y. Ji, X. Sun and J. Wang, *Appl. Catal. B: Environ.*, 2019, **244**, 844–852.
  16. G. Chen, Y. Zhu, H. M. Chen, Z. Hu, S. F. Hung, N. Ma, J. Dai, H. J. Lin, C. T. Chen, W. Zhou and Z. Shao, *Adv. Mater.*, 2019, **31**, 1900883–1900890.
  17. Y. Wang, Y. Zhou, M. Han, Y. Xi, H. You, X. Hao, Z. Li, J. Zhou, D. Song, D. Wang and F. Gao, *Small*, 2019, **15**, 1805435–1805443.
  18. Y. Chen, C. Dong, J. Zhang, C. Zhang and Z. Zhang, *J. Mater. Chem. A.*, 2018, **6**, 8430–8440.
  19. H. Fan, H. Yu, Y. Zhang, Y. Zheng, Y. Luo, Z. Dai, B. Li, Y. Zong and Q. Yan, *Angew. Chem., Int. Ed.*, 2017, **56**, 12566–12570.
  20. X. Yan, L. Tian, K. Li, S. Atkins, H. Zhao, J. Murowchick, L. Liu and X. Chen, *Adv. Mater. Interfaces*, 2016, **3**, 1600368–1600376.
